# Supplementary material for: Full Genomic Sequences of H5N1 Highly Pathogenic Avian Influenza Virus in Human Autopsy Specimens Reveal Genetic Variability and Adaptive Changes for Growth in MDCK Cell Cultures
Source: Hindawi journal article supplement (doi:10.1155/2021/3890681), 2021-01-01

PB2

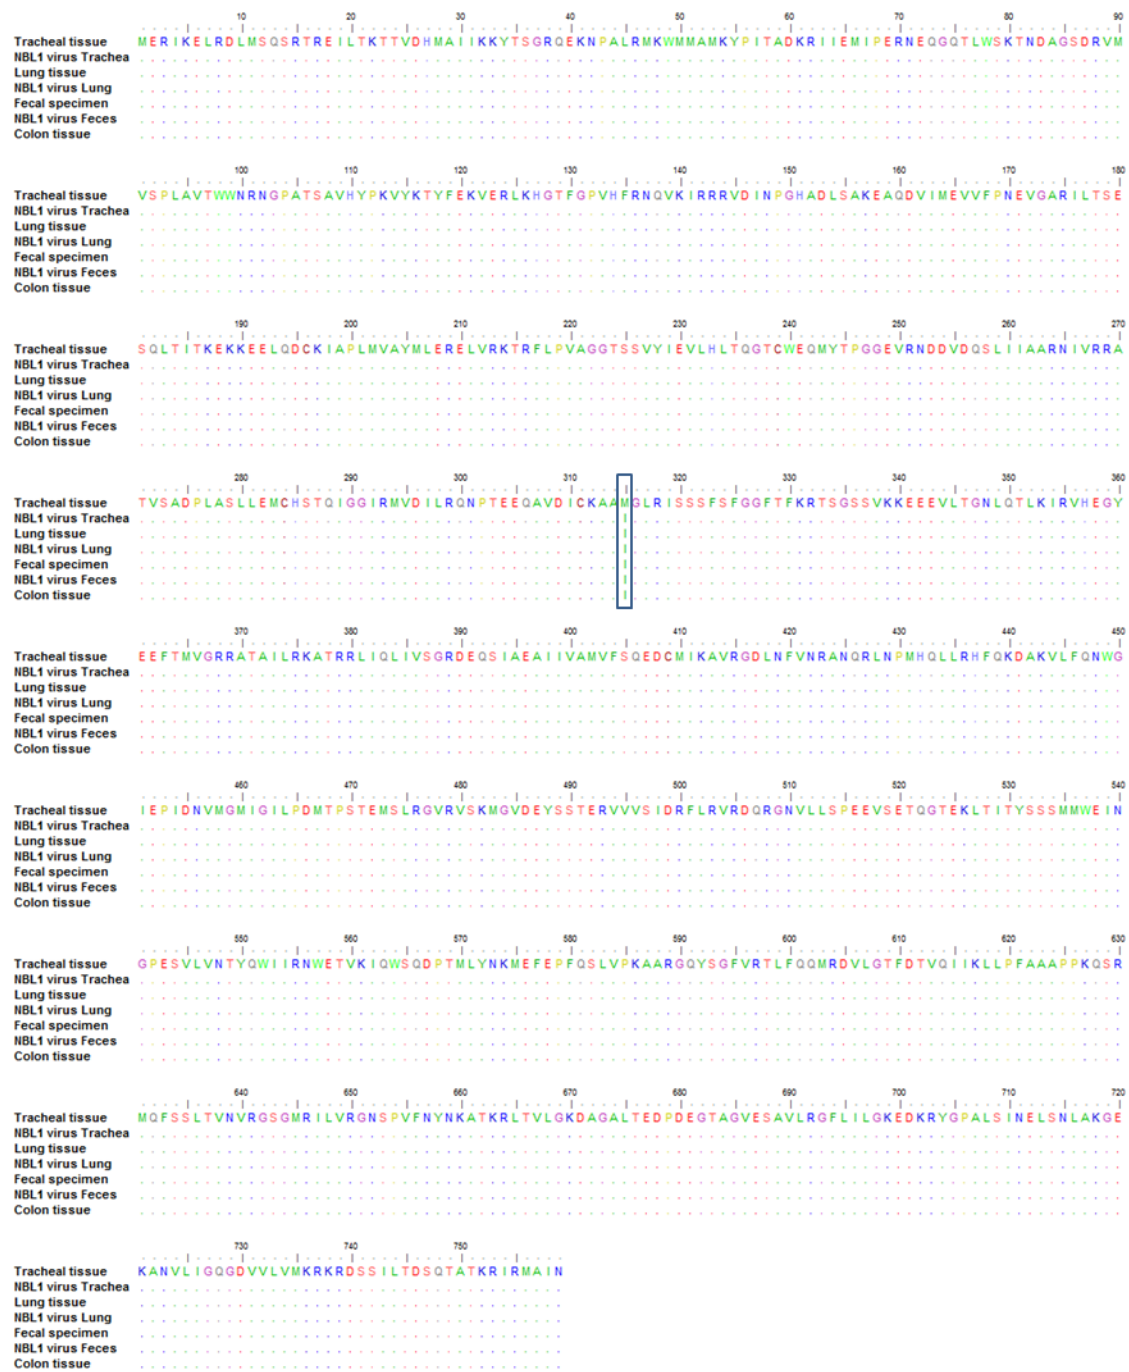

## PB1

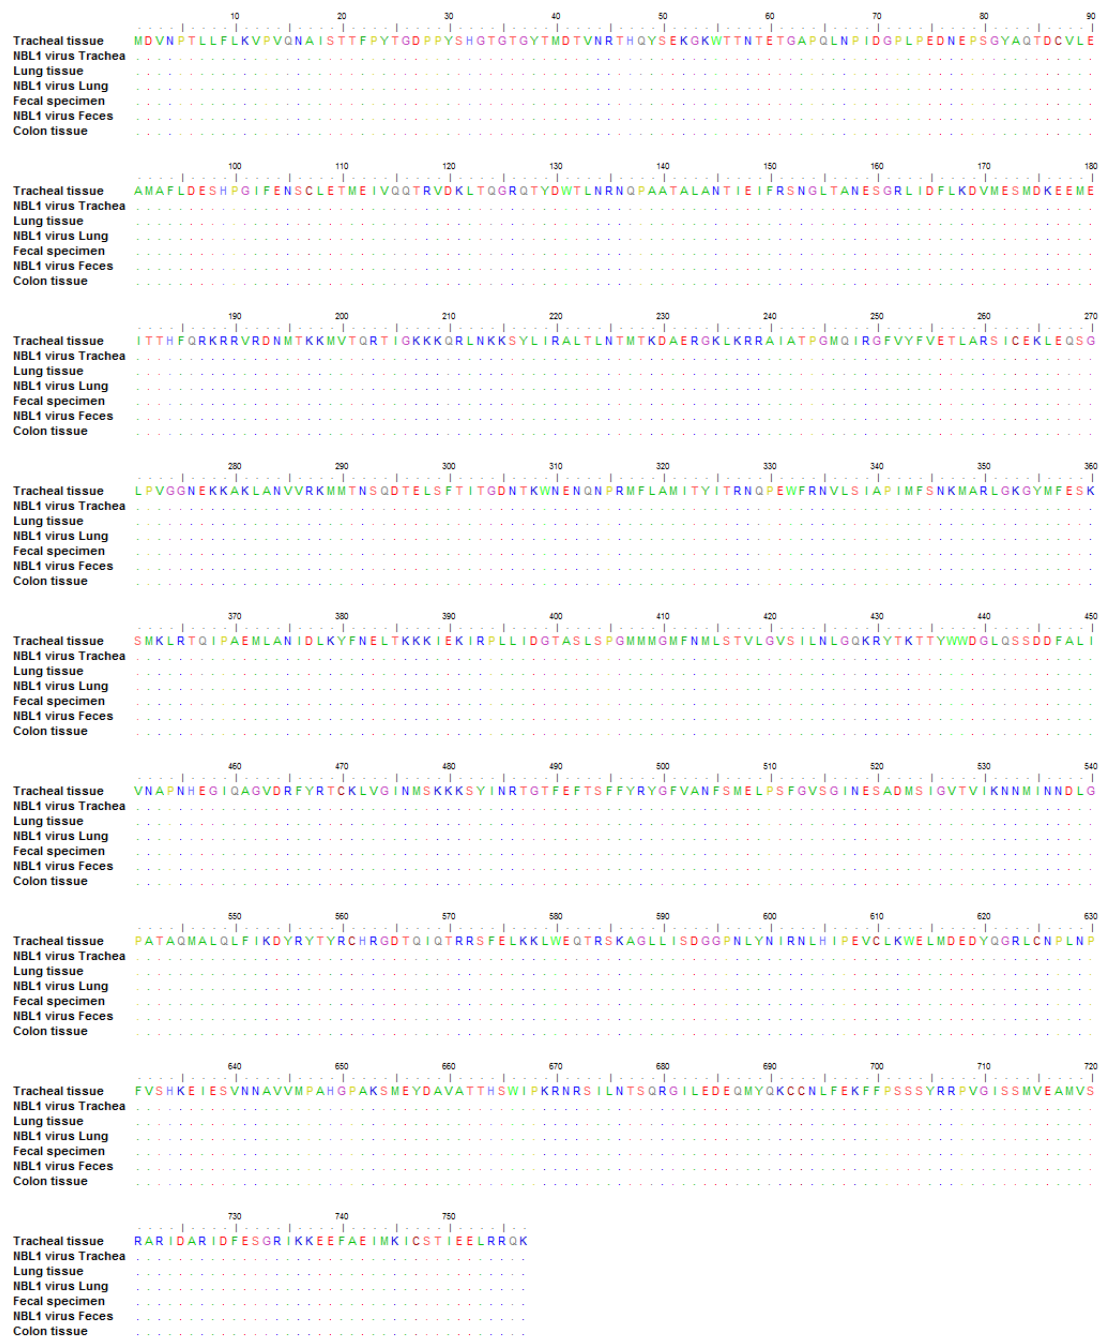

## PB1-F2

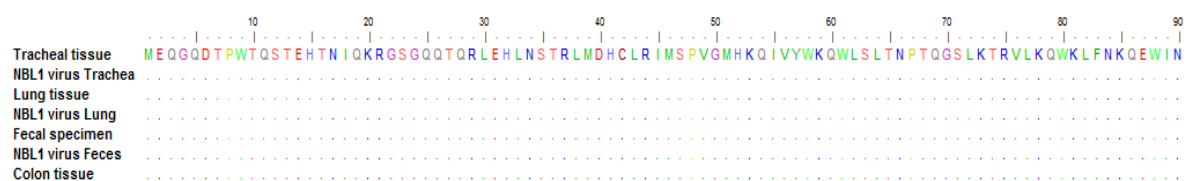

PA

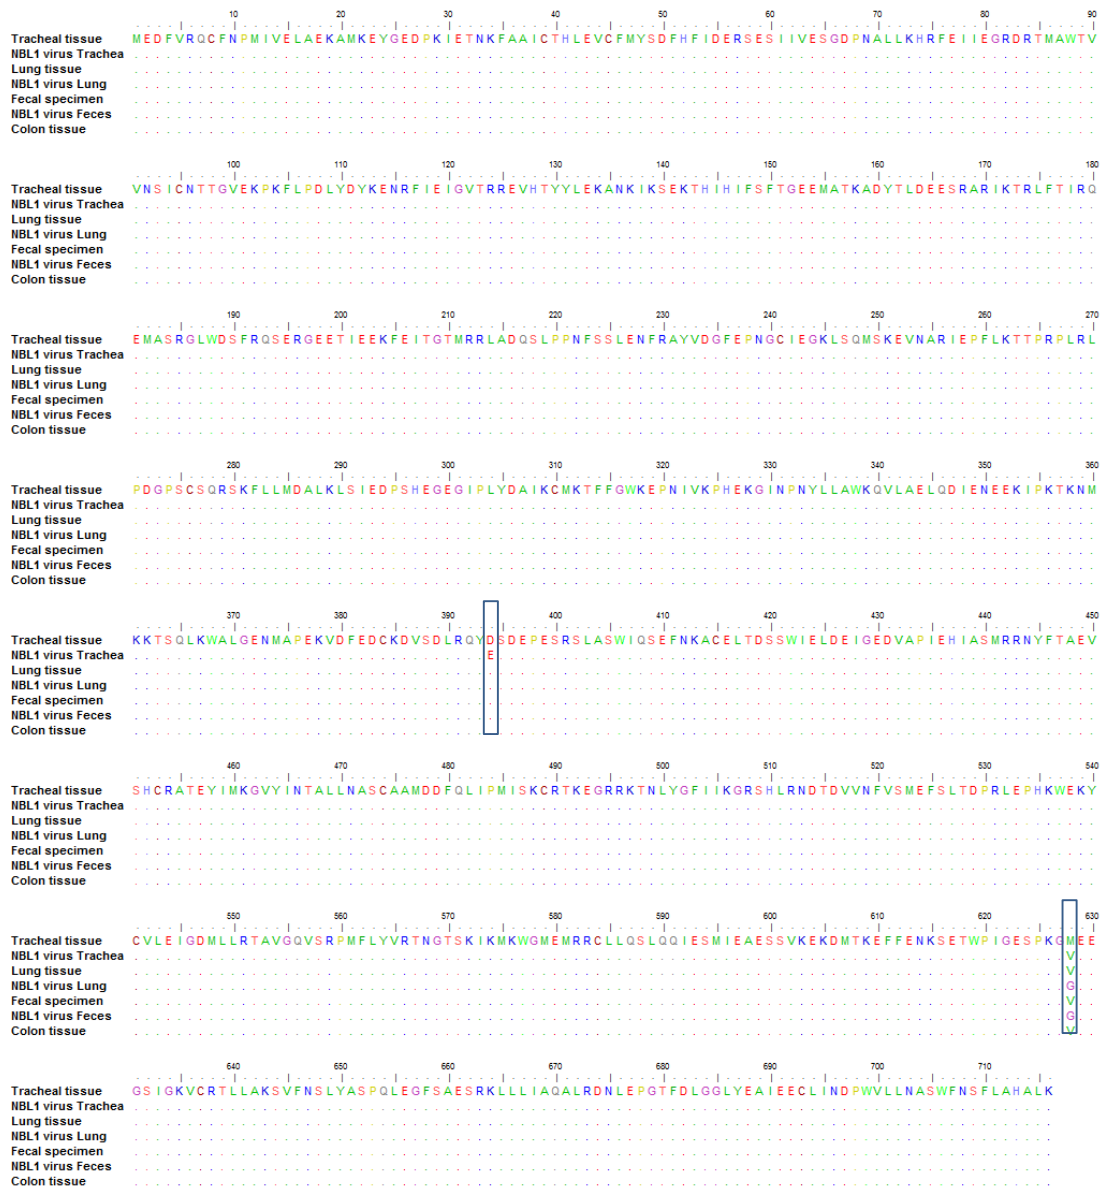

# HA

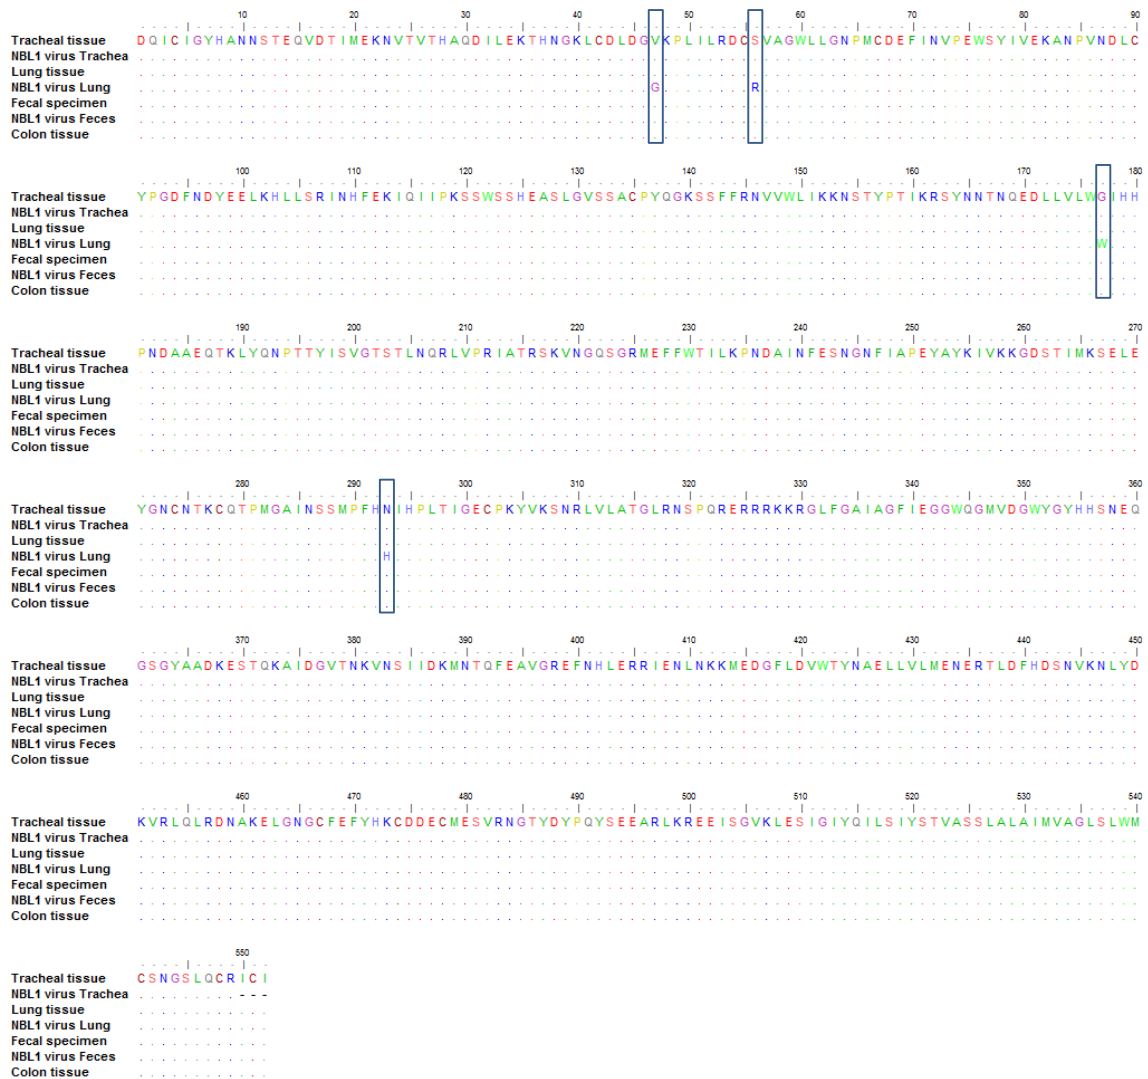

# NP

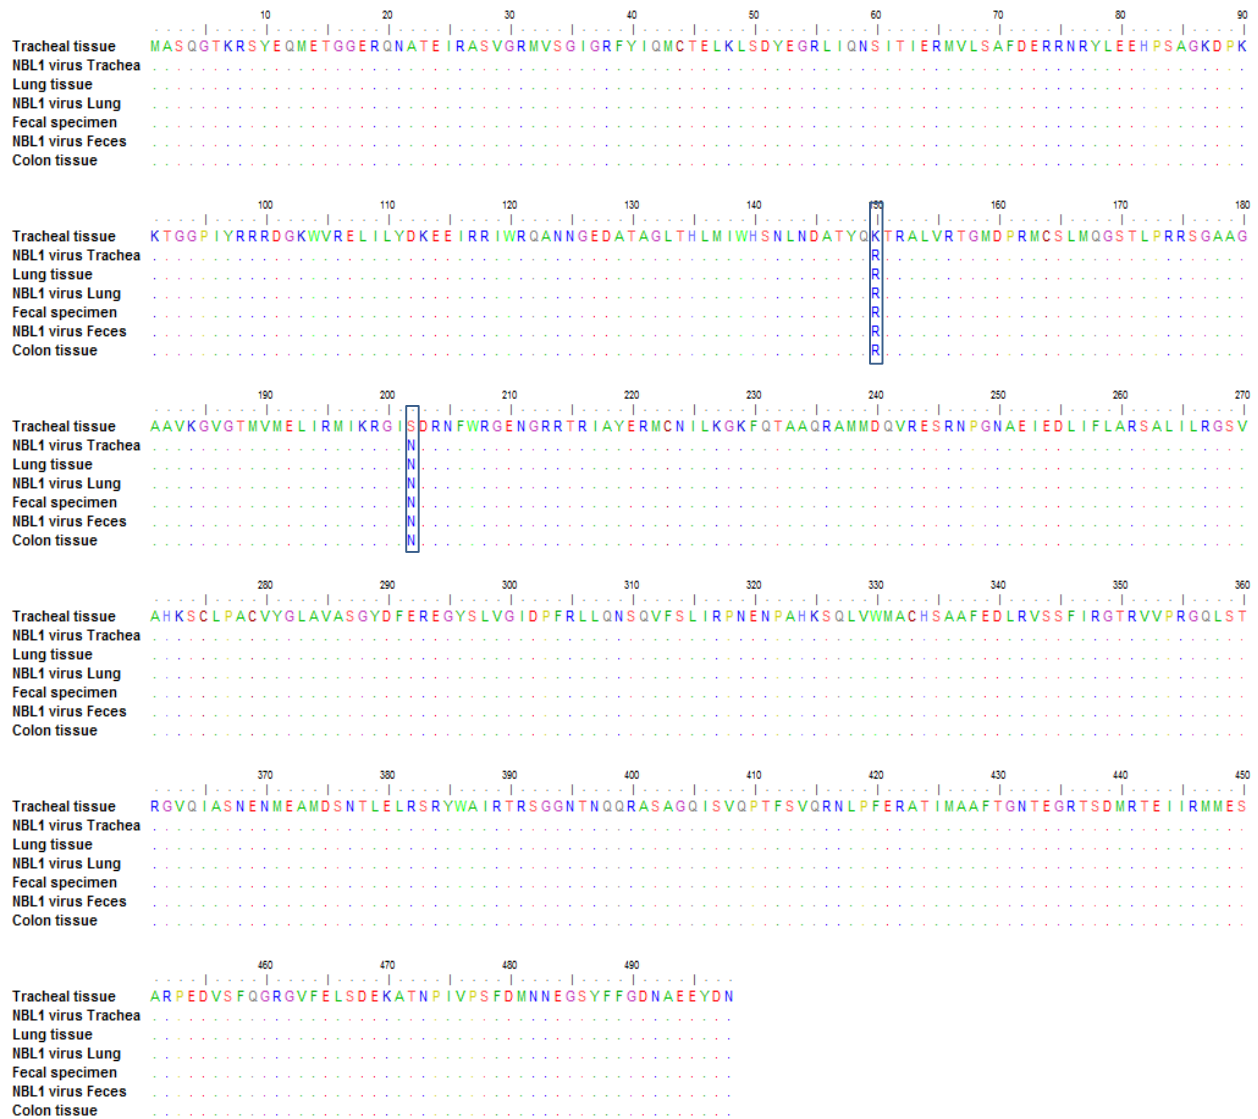

NA

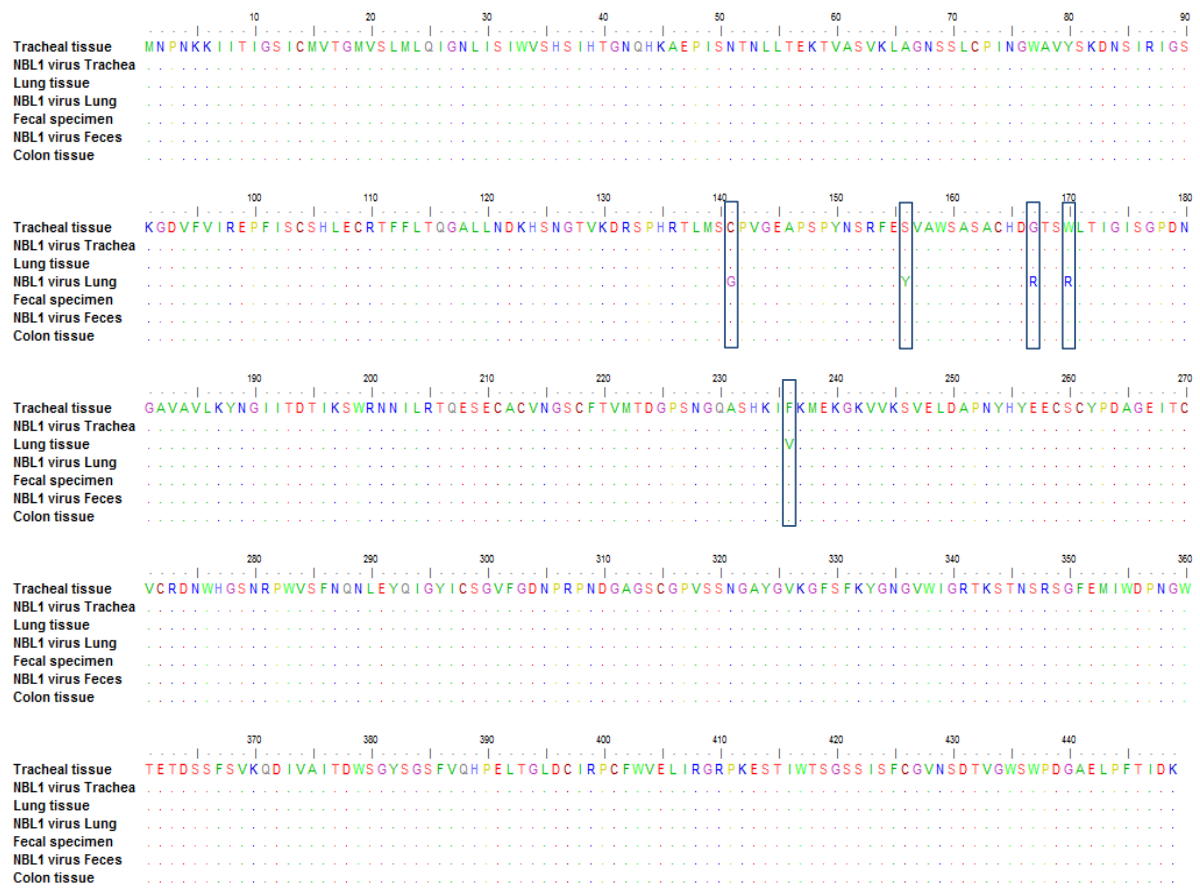

## M1

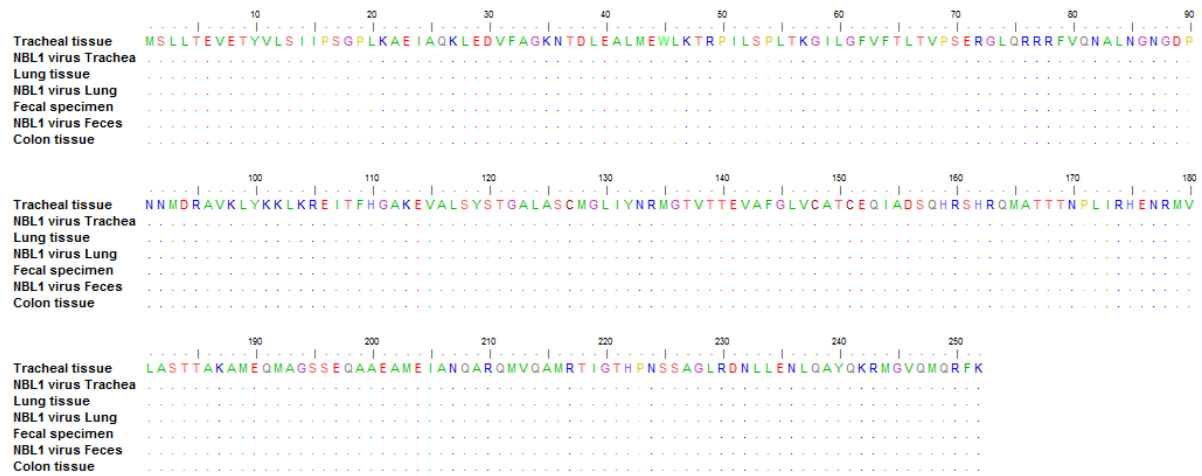

## M2

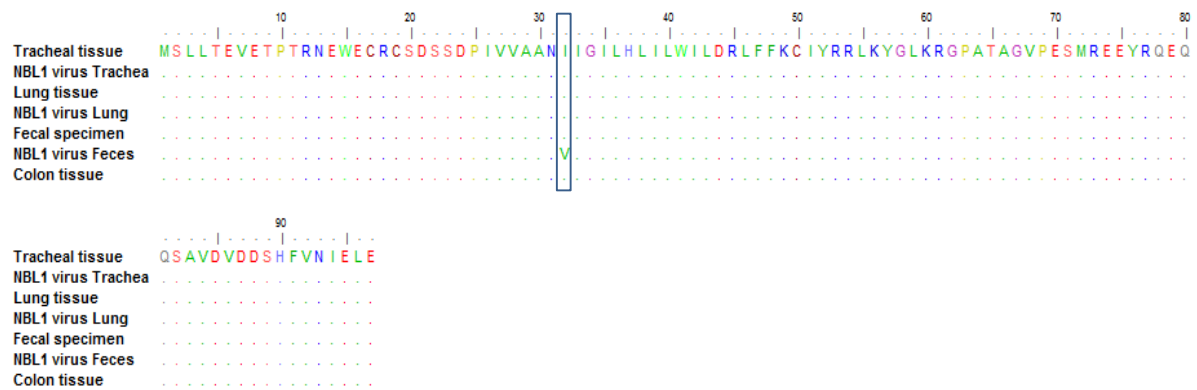

## NS1

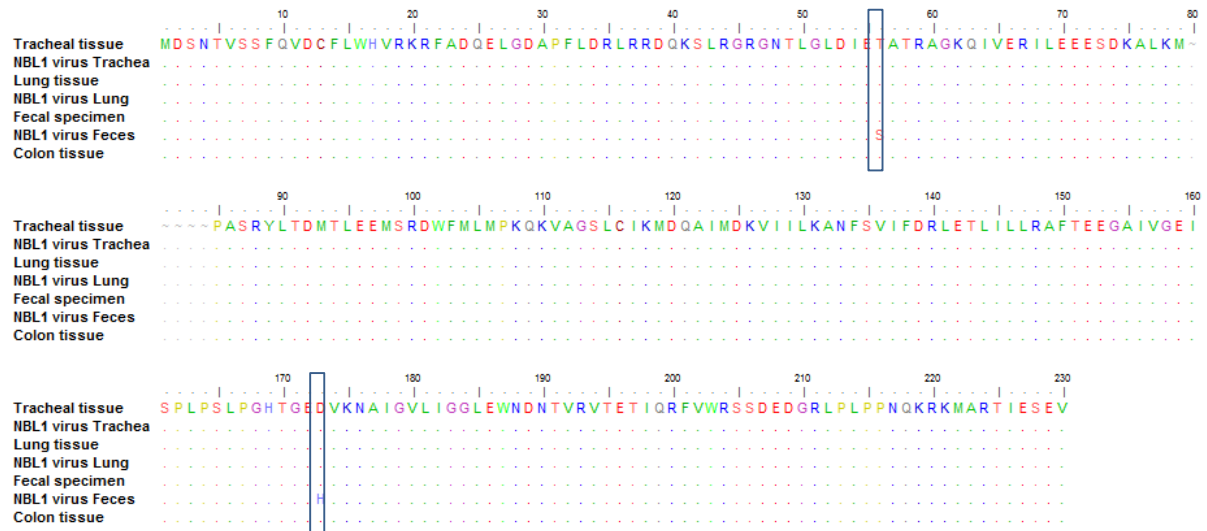

## NS2

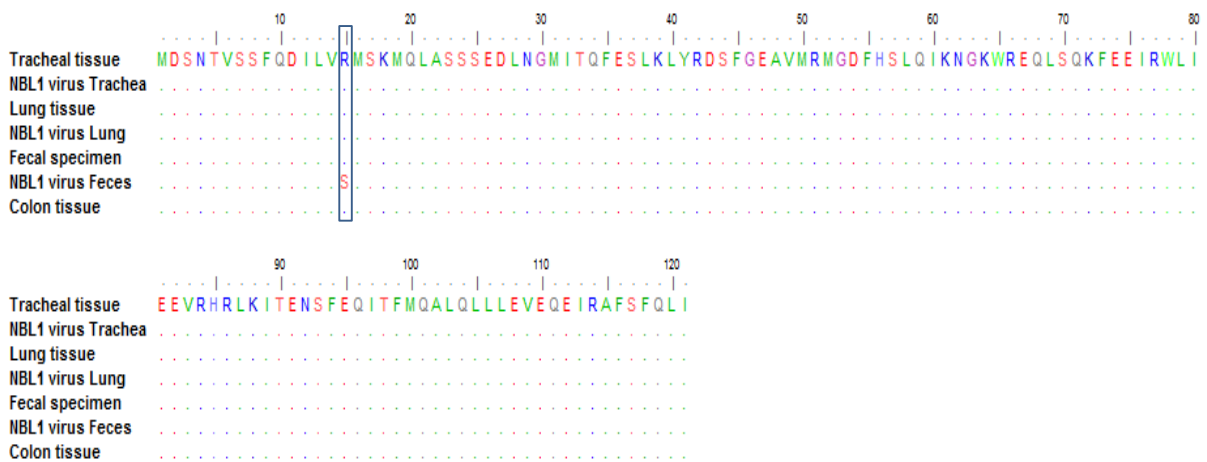

Supplement: f2 [file 3890681.f2.pdf]
